# Supplementary material for: Deciphering changes in the incidence of the Guillain-Barré syndrome during the COVID-19 pandemic: a nationwide time-series correlation study
Source: PubMed Central journal article supplement — BMJ Neurol Open. 2022 Dec 30;4(2):e000378. doi: 10.1136/bmjno-2022-000378 (PMC9808757; doi:10.1136/bmjno-2022-000378), 2022-12-30

## Supplementary figures

**Supplementary figure 1. The number of new GBS patients and SARS-CoV-2 vaccines administered, stratified by age groups from 2020 to 2021.** The number of new GBS patients in 2020 - 2021, and the number of SARS-CoV-2 vaccines administered in 2021 are collectively portrayed in this figure. The bold red line represents SARS-CoV-2 vaccination; the dotted black line, the number of GBS patients in 2020; and the bold black line, the number GBS patients in 2021. The x-axis represents months from January to December (identical for 2020 and 2021). The y-axis flanking the left side represents the number of newly diagnosed GBS patients in 2020-2021. The y-axis flanking the right side represents the number of SARS-CoV-2 vaccines administered in 2021.

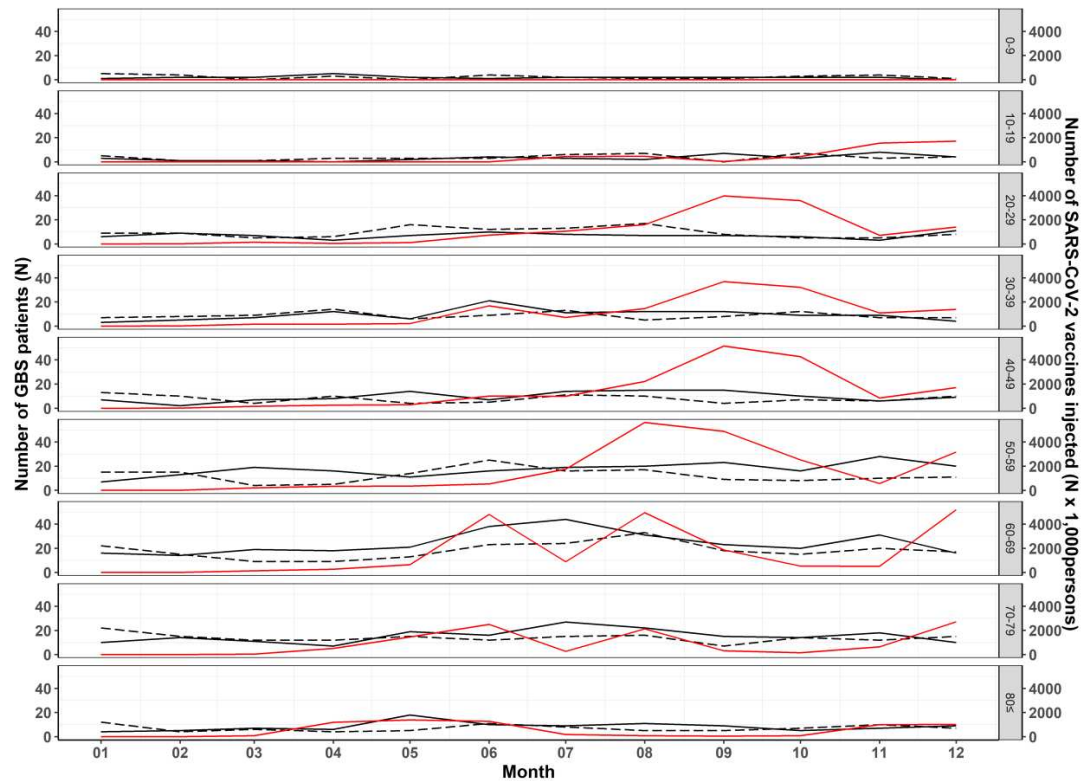

Supplement: bmjno-2022-000378supp001.pdf [file bmjno-2022-000378supp001.pdf]
